# Supplementary material for: Band and vacancy engineering in SnTe to improve its thermoelectric performance
Source: Royal Society of Chemistry journal article supplement (doi:10.1039/d3ta07585k), 2024-01-01
Supplement: d3ta07585k1.pdf [file d3ta07585k1.pdf]

# Band and Vacancy Engineering in SnTe to Improve its Thermoelectric Performance

Zan Yang<sup>a</sup>, Evan Smith<sup>b</sup>, Yu-Chih Tseng<sup>c</sup>, Kamil Ciesielski<sup>d</sup>, Sergei Novikov<sup>a</sup>, Thomas Kalab<sup>a</sup>,  
Yuyang Huang<sup>a</sup>, Eric Toberer<sup>d</sup> and Yuriy Mozharivskij<sup>\*a</sup>

## \* Corresponding Author

<sup>a</sup> Department of Chemistry and Chemical Biology, McMaster University, Ontario, Canada.

<sup>b</sup> Department of Physics and Astronomy, McMaster University, Ontario, Canada.

<sup>c</sup> CanmetMATERIALS, Natural Resources Canada, Ontario, Canada.

<sup>d</sup> Physics Department, Colorado School of Mines, America.

## Temperature-Dependent Single Kane Band Model

Because of the narrow band gap (0.18 eV at room temperature), the L band strongly interacts with the conduction band, making it highly non-parabolic. Therefore, the L band is considered as a Kane band. By applying the single Kane band model to the L band, we have<sup>1</sup>

$$S = \frac{k_B}{e} \left[ \frac{{}^1F_{-2}^1}{{}^0F_{-2}^1} - \xi \right] \quad (\text{S1})$$

$$L = \left( \frac{k_B}{e} \right)^2 \left[ \frac{{}^2F_{-2}^1}{{}^0F_{-2}^1} - \left( \frac{{}^1F_{-2}^1}{{}^0F_{-2}^1} \right)^2 \right] \quad (\text{S2})$$

$$p = Ap_{\text{Hall}} = \frac{(2m_d^* k_B T)^{3/2}}{3\pi^2 \hbar^3} {}^0F_0^{3/2} \quad (\text{S3})$$

$$A = \frac{3K(K+2) {}^0F_{-4}^{1/20} {}^0F_0^{3/2}}{(2K+1)^2 ({}^0F_{-2}^1)^2} \quad (\text{S4})$$

$$n_{F_k}^m = \int_0^\infty \left( -\frac{\partial f}{\partial \varepsilon} \right) \varepsilon^n (\varepsilon + \alpha \varepsilon^2)^m [(1 + 2\alpha \varepsilon)^2 + 2]^{k/2} d\varepsilon \quad (\text{S5})$$

Where  $k_B$  is the Boltzmann constant,  $\xi$  is the reduced Fermi energy  $\xi = E_f/k_B T$ .  $\hbar$  is the reduced Plank's constant,  $m_d^*$  is the DOS effective mass of the L band,  $S$  and  $L$  are the Seebeck coefficient and Lorenz number, respectively.  $p$  is the carrier concentration,  $p_{\text{Hall}}$  is the Hall carrier concentration,  $A$  is the Hall factor,  $\mu_{\text{Hall}}$  is the Hall mobility,  $\tau_{\text{total}}$  is the total relaxation time, and

$nF_k^m$  is the Fermi integration.  $\alpha$  is the non-parabolic parameter,  $\alpha = k_B T / E_g$ , and  $\varepsilon$  is the reduced energy,  $\varepsilon = E / k_B T$ .  $K = m_{\perp}^* / m_{\parallel}^*$  where  $m_{\perp}^*$  and  $m_{\parallel}^*$  are the transverse and longitudinal effective mass, respectively. For SnTe,  $K = 4^2$ .

$$m_I^* = 3 \left( \frac{2}{m_{\perp}^*} + \frac{1}{m_{\parallel}^*} \right)^{-1} \quad (\text{S6})$$

$$m_L^* = N_V^{2/3} m_b^* = N_V^{2/3} (m_{\perp}^{*2} m_{\parallel}^*)^{1/3} \quad (\text{S7})$$

$m_I^*$  and  $m_L^*$  are the inertia and DOS effective mass of the L band, respectively.  $N_v$  is the band degeneracy of L band,  $N_v = 4$ . It is well known that the band morphology of SnTe varies strongly with temperature, which makes the DOS effective mass temperature dependent. Therefore, to improve the accuracy of the simulation, we considered the temperature dependency of the band gap by introducing the Varshni model<sup>3</sup>:

$$E_g = E_g(0) - \frac{CT^2}{T + D} \quad (\text{S8})$$

Here  $E_g(0) = 0.25\text{eV}$  is the band gap at 0K,  $C$  and  $D$  are the fitting parameters. Based on the simulation of Jose et al.'s work<sup>4</sup>,  $C$  and  $D$  are determined to be  $2.078 \times 10^{-4} \text{ eV/K}$  and  $-8.673 \times 10^{-4} \text{ K}$ , respectively.

### Temperature-Dependent Two Band Model

It is well known that the band morphology of SnTe varies strongly with temperature, which results in fluctuations of the DOS effective mass. To improve the accuracy of the simulation, we considered the temperature dependency of the band gap by introducing the Varshni model<sup>3</sup> into the well-established two-band model of SnTe<sup>5</sup>. We also allowed the DOS effective masses of the L and  $\Sigma$  bands, as well as  $\Delta E_{L-\Sigma}$ , to vary with temperature. The weighted combination of two bands gives the total Seebeck coefficient and Lorenz number of the system<sup>6</sup>

$$S_{total} = \frac{S_L p_{N,L} b + S_H p_{N,H}}{p_{N,L} b + p_{N,H}} \quad (\text{S9})$$

$$L_{total} = \frac{L_L p_{N,L} b + L_H p_{N,H}}{p_{N,L} b + p_{N,H}} \quad (\text{S10})$$

Where  $S_L$  and  $S_H$ ,  $L_L$  and  $L_H$ ,  $\sigma_L$  and  $\sigma_H$ ,  $\mu_L$ , and  $\mu_H$  are the Seebeck coefficient, Lorenz number, electrical conductivity and mobility of the light hole band (L) and heavy hole band ( $\Sigma$ ),

respectively. The parameter  $b = \mu_L/\mu_H$ , and it is set to 8 for SnTe<sup>7</sup>. Because of the narrow band gap (0.18 eV at room temperature), the L band strongly interacts with the conduction band, making it highly non-parabolic. Therefore, the L band is considered a Kane band. By applying the Kane band model to the L band, we have<sup>1</sup>

$$S_L = \frac{k_B}{e} \left[ \frac{{}^1F_{-2}^1}{F_{-2}^1} - \xi \right] \quad (\text{S11})$$

$$L_L = \left( \frac{k_B}{e} \right)^2 \left[ \frac{{}^2F_{-2}^1}{F_{-2}^1} - \left( \frac{{}^1F_{-2}^1}{F_{-2}^1} \right)^2 \right] \quad (\text{S12})$$

$$p_L = \frac{(2m_L^* k_B T)^{3/2}}{3\pi^2 \hbar^3} {}^0F_0^{3/2} \quad (\text{S13})$$

$$A_L = \frac{3K(K+2) {}^0F_{-4}^{1/20} F_0^{3/2}}{(2K+1)^2 ({}^0F_{-2}^1)^2} \quad (\text{S14})$$

$m_L^*$  is the DOS effective mass of the L band and  $A_L$  is the Hall factor of the L band.

For the heavy hole  $\Sigma$  band, because of the significant energy separation with the L band ( $\sim 0.3$  eV), it is assumed that its interaction with the conduction band is small enough to be considered a parabolic band. Therefore, we use the parabolic band model to simulate the contribution from the  $\Sigma$  band<sup>8</sup>

$$S_\Sigma = \frac{k_B}{e} \left[ \frac{2F_1}{F_0} - (\xi - \Delta) \right] \quad (\text{S15})$$

$$L_\Sigma = \left( \frac{k_B}{e} \right)^2 \left[ \frac{3F_2(\xi)}{F_1(\xi)} - \left[ \frac{2F_1(\xi)}{F_0(\xi)} \right]^2 \right] \quad (\text{S16})$$

$$p_\Sigma = \frac{(2m_H^* k_B T)^{3/2}}{3\pi^2 \hbar^3} \frac{2F_0^2(\xi)}{F_{-1/2}(\xi)} \quad (\text{S17})$$

$$A_\Sigma = \frac{3}{2} F_{1/2} \frac{F_{-1/2}}{2F_0^2} \quad (\text{S18})$$

$$F_s = \int_0^\infty \frac{\varepsilon^s}{1 + \exp\left(\frac{\varepsilon - \xi - \Delta}{k_B T}\right)} d\varepsilon \quad (\text{S19})$$

Where  $F_s$  is the Fermi integration of the parabolic condition,  $m_{d,L}^*$  is the DOS effective mass of the

heavy hole  $\Sigma$  band, and  $\Delta$  is the reduced energy separation between the L and  $\Sigma$  bands,  $\Delta = \Delta E_{L-\Sigma}/k_B T$ . Here,  $d\Delta E_{L-\Sigma}/dT$  is taken as 0.0003eV/K and the value of  $m_H^*$  is directly fitted according to the simulation results given by Zhou et al. <sup>5</sup>.

### Doping Effect of Ge in SnTe

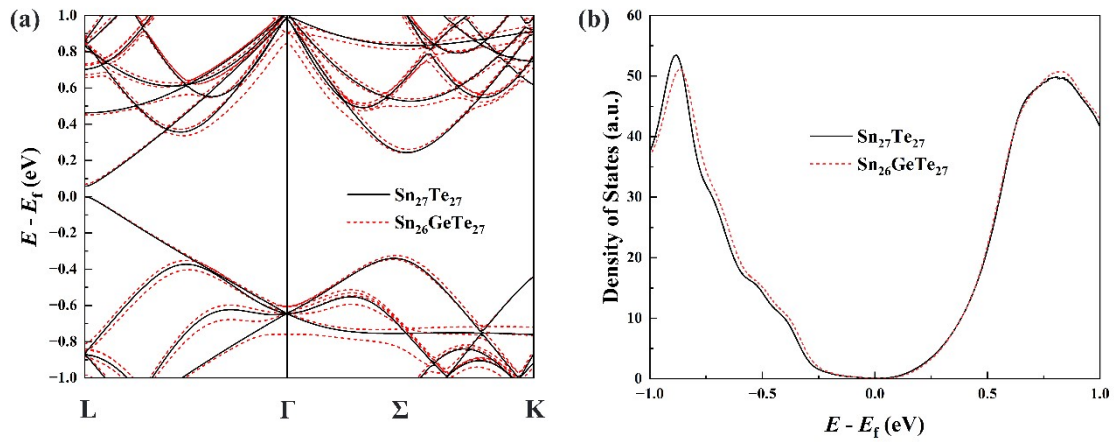

**Figure S1.** Doping effect of Ge in SnTe. (a) Band structure and (b) density of states. The solid black line and red dashed line represent the pristine SnTe and Ge-doped SnTe, respectively.

## **Single and Multi-Band Model Simulation Results**

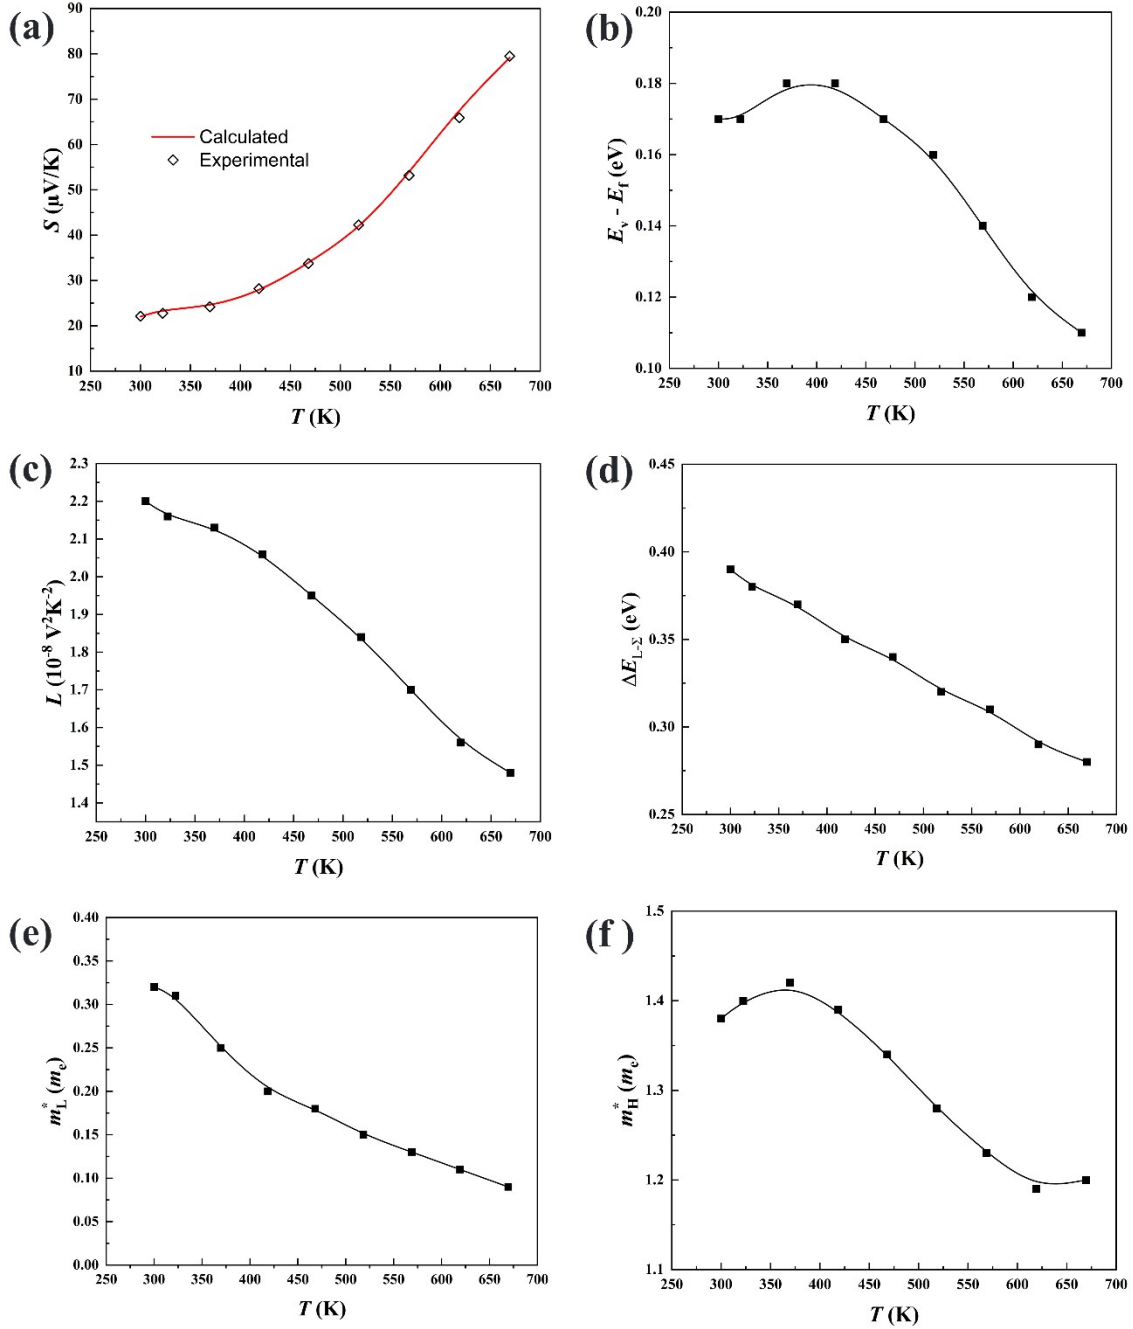

**Figure S2.** TD-TB simulation results for  $\text{Sn}_{0.98}\text{Ge}_{0.05}\text{Te}$ . (a) Seebeck coefficient, (b) energy separation between top of the valence band  $E_V$  and Fermi level  $E_f$ , (c) Lorenz number, (d) Energy separation between the L and  $\Sigma$  bands, (e) DOS effective mass of the L band, and (f) DOS effective mass of the  $\Sigma$  band. The black lines in (b) ~ (f) are guide for the eyes.

As shown in **Figure S3** (a), most of the carriers are located at the L band, which suggests the

contribution of the lower  $\Sigma$  band may be neglectable. This can be verified by comparing the Lorenz numbers calculated by the two-band model and single-band model shown in **Figure S3** (b). The simulation result shows that the  $\Sigma$  band has very little impact on the outcome. Therefore, for simplicity, we used the single band model to calculate the Lorenz number for all samples.

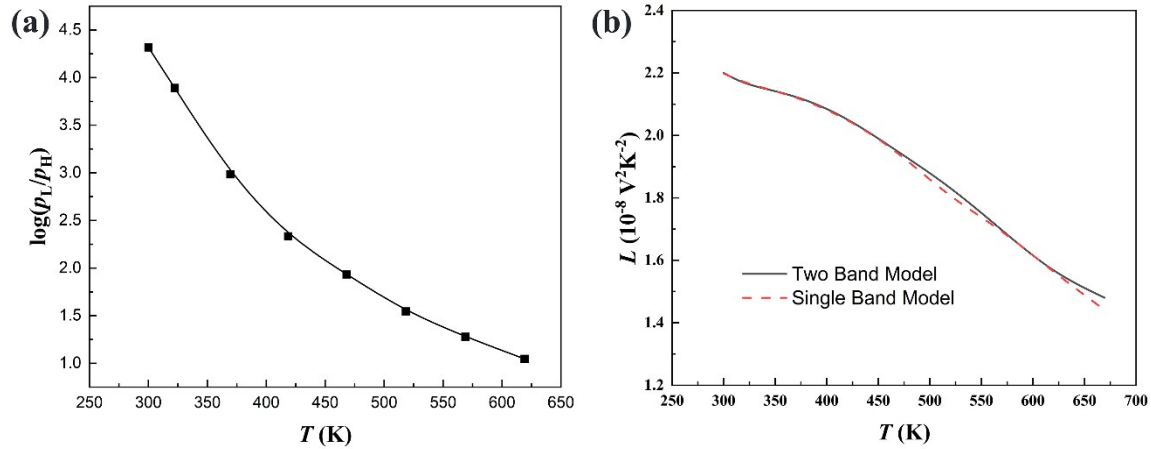

**Figure S3.** (a) The natural logarithm of the ratio of carrier concentrations distributed in the L and  $\Sigma$  bands. (b) Lorenz number computed by the two-band model (solid black line) and single-band model (red dash line).

### Scattering Factor Determination

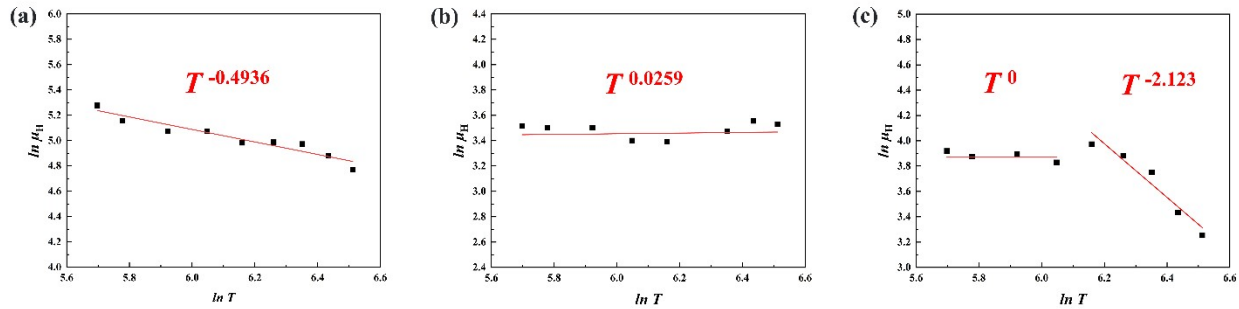

**Figure S4.**  $\ln \mu_H$  vs.  $\ln T$  of  $(\text{Sn}_{0.98}\text{Ge}_{0.05}\text{Te})_{1-x}(\text{Sb}_2\text{Pb}_y\text{Te}_3)_x$  series. (a)  $x = 0, y = 0$ , (b)  $x = 0.09, y = 0$  and (c)  $x = 0.09, y = 0.5$  (see main text).

### Electron Backscatter Diffraction Analysis

From our electron backscatter diffraction analysis, we find that Pb compensation increases the average grain size from 0.6  $\mu\text{m}$  to 1.36  $\mu\text{m}$ .  $\text{SnTe}_3\text{O}_8$  (yellow area in phase maps of Figure S5 (c), (d)) could be found along the grain boundaries, which is caused by the inevitable oxidation during the sample synthesis.

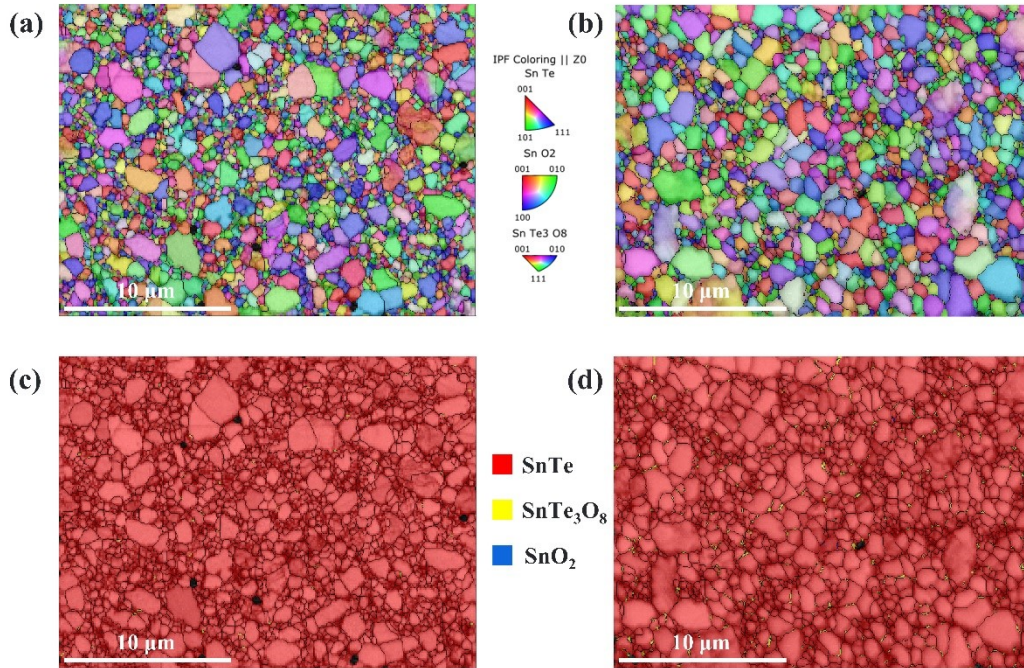

**Figure S5.** (a), (c) Electron backscatter diffraction map and phase map of  $(\text{Sn}_{0.98}\text{Ge}_{0.05}\text{Te})_{0.91}(\text{Sb}_2\text{Te}_3)_{0.09}$  and (b), (d) electron backscatter diffraction map and phase map of  $(\text{Sn}_{0.98}\text{Ge}_{0.05}\text{Te})_{0.91}(\text{Sb}_2\text{Pb}_{0.5}\text{Te}_3)_{0.09}$ .

## Effect of Sb Precipitation



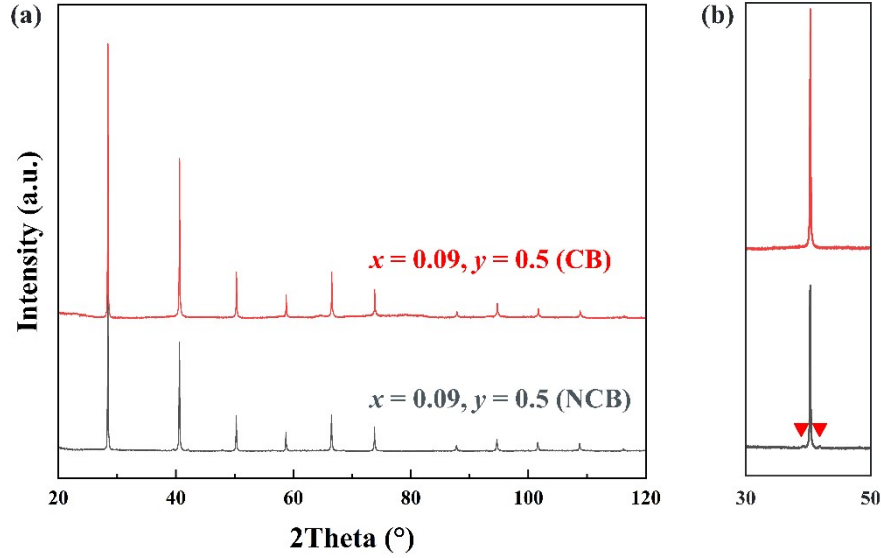

**Figure S6.** (a) Powder XRD pattern of the NCB and CB samples (see main text). (b) A close-up image of the pattern in the range from  $30^\circ$  to  $50^\circ$ ; the peaks marked by red triangles result from Sb precipitates.

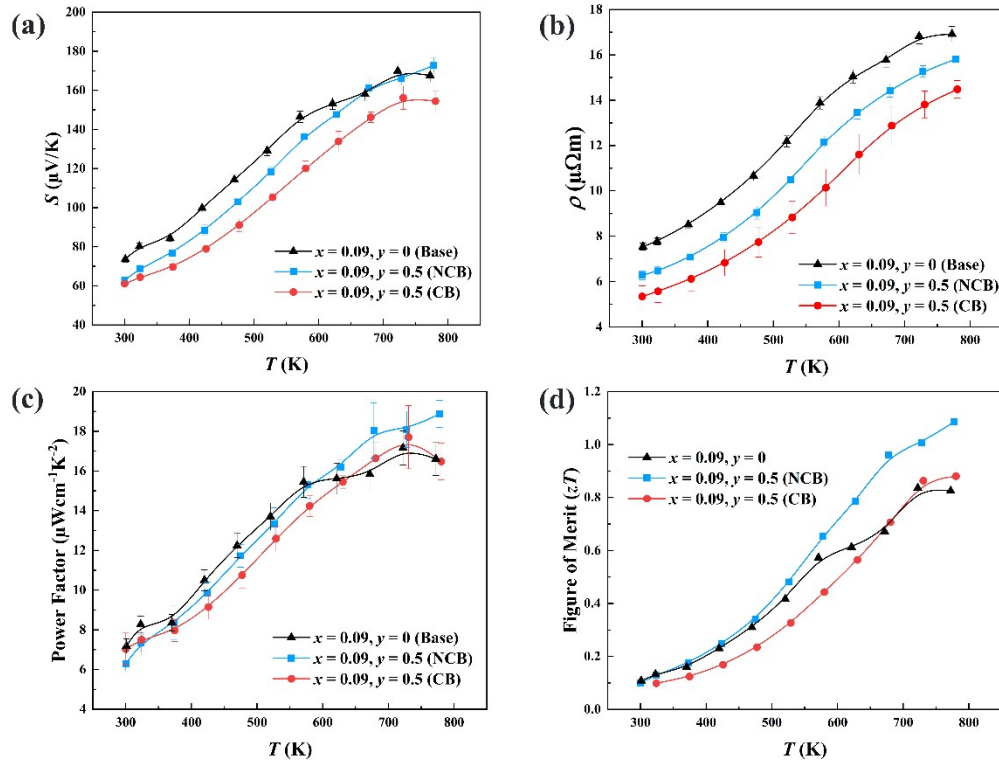

**Figure S7.** A comparison of (a) Seebeck coefficient, (b) resistivity, (c) power factor and (d)  $zT$  values between Base, CB and NCB samples (see main text).

The compositions of base material (Base), charge balanced (CB) sample and the non-charge balanced (NCB) sample are  $(\text{Sn}_{0.98}\text{Ge}_{0.05}\text{Te})_{0.91}(\text{Sb}_2\text{Te}_3)_{0.09}$ ,  $(\text{Sn}_{0.98}\text{Ge}_{0.05}\text{Te})_{0.91}(\text{Sb}_{1.4644}\text{Pb}_{0.5}\text{Te}_3)_{0.09}$  and  $(\text{Sn}_{0.98}\text{Ge}_{0.05}\text{Te})_{0.91}(\text{Sb}_2\text{Pb}_{0.5}\text{Te}_3)_{0.09}$ , respectively.

### Reproducibility Test

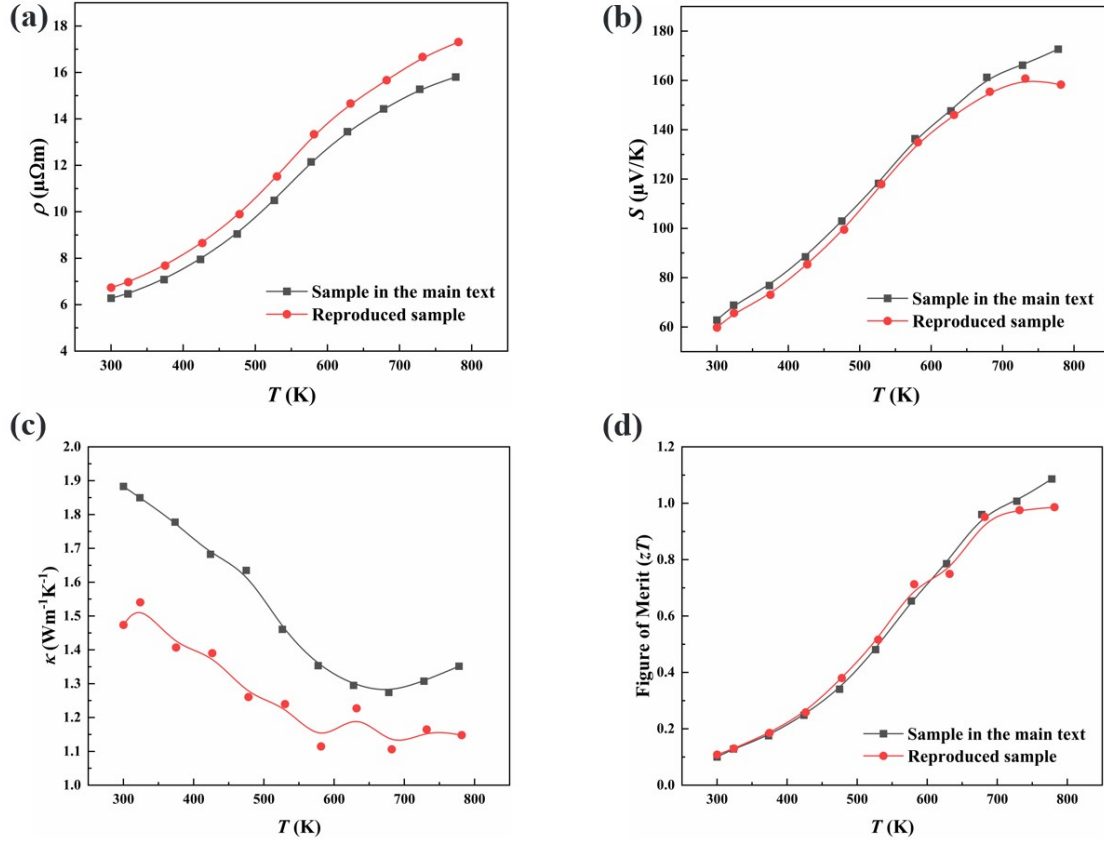

**Figure S8.** (a) Electrical resistivity, (b) Seebeck coefficient, (c) thermal conductivity and (d)  $zT$  value of three trials. Samples of these trials are synthesised separately using the same method.

**Table S1.** Density of Samples

| Composition         | $\rho_M$ (gcm <sup>-3</sup> ) | $\rho_T$ (gcm <sup>-3</sup> ) | Relative Density (%) |
|---------------------|-------------------------------|-------------------------------|----------------------|
| $x = 0, y = 0$      | 6.16                          | 6.41                          | 96.10                |
| $x = 0.03, y = 0$   | 6.33                          | 6.43                          | 98.44                |
| $x = 0.06, y = 0$   | 6.16                          | 6.30                          | 97.78                |
| $x = 0.09, y = 0$   | 6.09                          | 6.34                          | 96.06                |
| $x = 0.09, y = 0.2$ | 6.14                          | 6.40                          | 95.94                |
| $x = 0.09, y = 0.5$ | 6.36                          | 6.53                          | 97.40                |
| $x = 0.09, y = 0.8$ | 6.31                          | 6.62                          | 95.32                |

**Table S2.** Room-Temperature Hall Data

| Composition         | $\rho_{\text{Hall}}$ ( $10^{20} \text{ cm}^{-3}$ ) | $\mu_{\text{Hall}}$ ( $\text{cm}^2\text{V}^{-1}\text{s}^{-1}$ ) | $m_L^*$ ( $m_e$ ) |
|---------------------|----------------------------------------------------|-----------------------------------------------------------------|-------------------|
| $x = 0, y = 0$      | 1.89                                               | 195.91                                                          | 0.32              |
| $x = 0.03, y = 0$   | 2.87                                               | 64.11                                                           | 0.79              |
| $x = 0.06, y = 0$   | 2.87                                               | 45.51                                                           | 0.87              |
| $x = 0.09, y = 0$   | 2.60                                               | 33.40                                                           | 1.04              |
| $x = 0.09, y = 0.2$ | 2.56                                               | 41.83                                                           | 0.91              |
| $x = 0.09, y = 0.5$ | 2.10                                               | 50.42                                                           | 0.80              |
| $x = 0.09, y = 0.8$ | 1.87                                               | 56.38                                                           | 0.74              |

**Table S3.** Selected crystallographic data, experimental details, and refinement results for the  $(\text{Sn}_{0.98}\text{Ge}_{0.05}\text{Te})_{1-x}(\text{Sb}_2\text{Pb}_y\text{Te}_3)_x$  single crystals.

| Composition                                                | $x = 0$<br>$y = 0$                                                  | $x = 0.03$<br>$y = 0$                                               | $x = 0.06$<br>$y = 0$                                              | $x = 0.09$<br>$y = 0$                                          | $x = 0.09$<br>$y = 0.2$                                            | $x = 0.09$<br>$y = 0.5$                                           | $x = 0.09$<br>$y = 0.8$                                        |
|------------------------------------------------------------|---------------------------------------------------------------------|---------------------------------------------------------------------|--------------------------------------------------------------------|----------------------------------------------------------------|--------------------------------------------------------------------|-------------------------------------------------------------------|----------------------------------------------------------------|
| <b>Sn Site Occupancy (%)</b>                               | 97.7(2)                                                             | 95.7(5)                                                             | 94.3(4)                                                            | 92.9(1)                                                        | 94.1(5)                                                            | 95.1(3)                                                           | 97.6(3)                                                        |
| <b>Crystal System</b>                                      | Cubic                                                               |                                                                     |                                                                    |                                                                |                                                                    |                                                                   |                                                                |
| <b>Space Group</b>                                         | $Fm\bar{3}m$                                                        |                                                                     |                                                                    |                                                                |                                                                    |                                                                   |                                                                |
| <b><math>a</math>, Å</b>                                   | 6.3030(7)                                                           | 6.2879(7)                                                           | 6.2775(7)                                                          | 6.2672(7)                                                      | 6.2751(7)                                                          | 6.2756(7)                                                         | 6.2858(7)                                                      |
| <b>Volume, Å<sup>3</sup></b>                               | 250.40(8)                                                           | 248.61(8)                                                           | 247.38(8)                                                          | 246.16(8)                                                      | 247.09(8)                                                          | 247.15(8)                                                         | 248.36(8)                                                      |
| <b>Z</b>                                                   | 4                                                                   |                                                                     |                                                                    |                                                                |                                                                    |                                                                   |                                                                |
| <b><math>\mu/\text{mm}^{-1}</math></b>                     | 20.978                                                              | 20.933                                                              | 20.889                                                             | 20.868                                                         | 20.987                                                             | 20.908                                                            | 21.175                                                         |
| <b><math>F(000)</math></b>                                 | 404                                                                 | 400                                                                 | 396                                                                | 394                                                            | 398                                                                | 396                                                               | 404                                                            |
| <b><math>2\theta</math> Range (°)</b>                      | 5.604 -<br>34.319                                                   | 5.618 -<br>34.413                                                   | 5.627 -<br>34.478                                                  | 5.636 -<br>32.135                                              | 5.629 -<br>34.493                                                  | 5.629 -<br>34.490                                                 | 5.619 -<br>32.029                                              |
| <b>Index Ranges</b>                                        | $-10 \leq h \leq 10$<br>$-10 \leq k \leq 9$<br>$-10 \leq l \leq 10$ | $-10 \leq h \leq 10$<br>$-9 \leq k \leq 10$<br>$-10 \leq l \leq 10$ | $-10 \leq h \leq 10$<br>$-9 \leq k \leq 10$<br>$-10 \leq l \leq 9$ | $-9 \leq h \leq 8$<br>$-9 \leq k \leq 9$<br>$-9 \leq l \leq 9$ | $-10 \leq h \leq 9$<br>$-10 \leq k \leq 10$<br>$-8 \leq l \leq 10$ | $-10 \leq h \leq 9$<br>$-10 \leq k \leq 9$<br>$-10 \leq l \leq 7$ | $-9 \leq h \leq 9$<br>$-8 \leq k \leq 9$<br>$-7 \leq l \leq 9$ |
| <b>Reflections Collected</b>                               | 1587                                                                | 1110                                                                | 1102                                                               | 1387                                                           | 1095                                                               | 1070                                                              | 567                                                            |
| <b>Data/Restraints/ Parameters</b>                         | 46/0/4                                                              | 46/0/5                                                              | 46/0/4                                                             | 39/0/4                                                         | 46/0/5                                                             | 46/0/4                                                            | 38/0/4                                                         |
| <b>GOOF</b>                                                | 1.240                                                               | 1.067                                                               | 0.937                                                              | 0.908                                                          | 1.193                                                              | 1.293                                                             | 1.139                                                          |
| <b><math>R_1</math> (<math>I &gt; 2\sigma(I)</math>)</b>   | 0.0130                                                              | 0.0109                                                              | 0.0141                                                             | 0.0052                                                         | 0.0107                                                             | 0.0258                                                            | 0.0110                                                         |
| <b>Largest diff. peak/hole (<math>e/\text{Å}^3</math>)</b> | 0.660/-0.642                                                        | 0.559/-0.242                                                        | 0.380/-0.434                                                       | 0.357/-0.212                                                   | 0.51/-0.61                                                         | 0.88/-1.36                                                        | 0.36/-0.70                                                     |

**Table S4.** Sound Velocity Measurement data.  $v_l$  is the longitudinal velocity,  $v_t$  is the transverse velocity, and  $v$  is the bulk sound velocity.

| Composition         | $v_l$ (m/s) | $v_t$ (m/s) | $v$ (m/s) |
|---------------------|-------------|-------------|-----------|
| $x = 0, y = 0$      | 3300.8      | 1911.7      | 2121.8    |
| $x = 0.03, y = 0$   | 3293.8      | 1898.2      | 2107.7    |
| $x = 0.06, y = 0$   | 3201.2      | 1836.7      | 2040.2    |
| $x = 0.09, y = 0$   | 2863.2      | 1694.0      | 1876.5    |
| $x = 0.09, y = 0.2$ | 3191.7      | 1825.5      | 2028.3    |
| $x = 0.09, y = 0.5$ | 3183.0      | 1841.7      | 2044.2    |
| $x = 0.09, y = 0.8$ | 2927.3      | 1698.5      | 1884.8    |

Here  $v$  is given by

$$v = \left[ \frac{1}{3} \left( \frac{1}{v_l^3} + \frac{2}{v_t^3} \right) \right]^{-1/3} \quad (\text{S20})$$

## References

- (1) Pei, Y.; LaLonde, A. D.; Wang, H.; Snyder, G. J. Low Effective Mass Leading to High Thermoelectric Performance. *Energy Environ. Sci.* **2012**, *5* (7), 7963. <https://doi.org/10.1039/c2ee21536e>.
- (2) Seddon, T.; Gupta, S. C.; Saunders, G. A. Hole Contribution to the Elastic Constants of SnTe. *Solid State Communications* **1976**, *20* (1), 69–72. [https://doi.org/10.1016/0038-1098\(76\)91701-4](https://doi.org/10.1016/0038-1098(76)91701-4).
- (3) Varshni, Y. P. TEMPERATURE DEPENDENCE OF THE ENERGY GAP IN SEMICONDUCTORS. 6.
- (4) Querales-Flores, J. D.; Aguado-Puente, P.; Dangić, Đ.; Cao, J.; Chudzinski, P.; Todorov, T. N.; Grüning, M.; Fahy, S.; Savić, I. Towards Temperature-Induced Topological Phase Transition in SnTe: A First-Principles Study. *Phys. Rev. B* **2020**, *101* (23), 235206. <https://doi.org/10.1103/PhysRevB.101.235206>.
- (5) Zhou, M.; Gibbs, Z. M.; Wang, H.; Han, Y.; Xin, C.; Li, L.; Snyder, G. J. Optimization of Thermoelectric Efficiency in SnTe: The Case for the Light Band. *Phys. Chem. Chem. Phys.* **2014**, *16* (38), 20741–20748. <https://doi.org/10.1039/C4CP02091J>.
- (6) Lundstrom, M. S.; Jeong, C. *Near-Equilibrium Transport: Fundamentals and Applications*; World Scientific Publishing Company, 2012; Vol. 2.
- (7) Rogers, L. M. Valence Band Structure of SnTe. *J. Phys. D: Appl. Phys.* **1968**, *1* (7), 845–852. <https://doi.org/10.1088/0022-3727/1/7/304>.
- (8) May, A. F.; Snyder, G. J. Introduction to Modeling Thermoelectric Transport at High Temperatures.
